# Supplementary material for: PgC3Mg metal–organic cages functionalized hydrogels with enhanced bioactive and ROS scavenging capabilities for accelerated bone regeneration
Source: Royal Society of Chemistry journal article supplement (doi:10.1039/d2tb00907b), 2022-01-01
Supplement: d2tb00907b1.pdf [file d2tb00907b1.pdf]

## **PgC<sub>3</sub>Mg metal-organic cages functionalized hydrogel with enhanced bioactive and ROS scavenging capabilities for accelerated bone regeneration**

Xiujun Tan,<sup>ab</sup> Jiayi Wu,<sup>a</sup> Rui Wang,<sup>a</sup> Chenglin Wang,<sup>a</sup> Yimin Sun,<sup>a</sup> Zhenming Wang,<sup>\*a</sup> and Ling Ye<sup>\*ac</sup>

<sup>a</sup> State Key Laboratory of Oral Diseases & National Clinical Research Center for Oral Diseases, West China Hospital of Stomatology, Sichuan University, Chengdu 610041, P. R. China.

<sup>b</sup> Stomatological Hospital of Chongqing Medical University, Chongqing Medical University, Chongqing, 401147, P. R. China;

<sup>c</sup> Med-X Center for Materials, Sichuan University, Chengdu 610065, China

\*Corresponding author: Dr. Ling Ye, West China School of Stomatology, Sichuan University, No. 14, 3th Section, South Renmin Road, Wuhou District, Chengdu 610041, China. Telephone: 86-028-85503585; E-mail: yeling@scu.edu.cn;

Dr. Zhenming Wang, West China School of Stomatology, Sichuan University, No. 14, 3th Section, South Renmin Road, Wuhou District, Chengdu 610041, China.

Telephone: 86-028-85503585; E-mail: zmwang1220@163.com

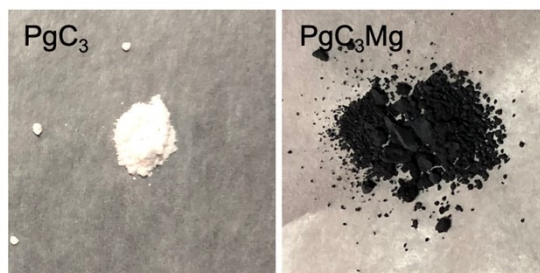

**Fig. S1.** Optical images of  $\text{PgC}_3$  and  $\text{PgC}_3\text{Mg}$  powders.

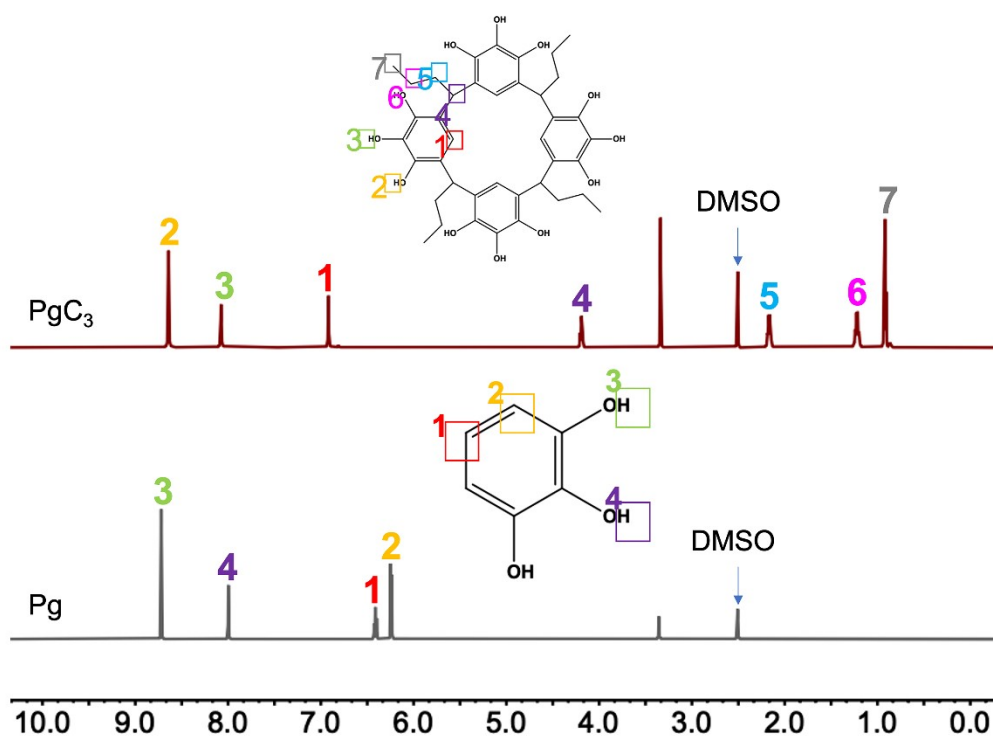

**Fig. S2.**  $^1\text{H}$  NMR spectra (600 MHz, DMSO, room temperature) of  $\text{PgC}_3$  and  $\text{Pg}$ .

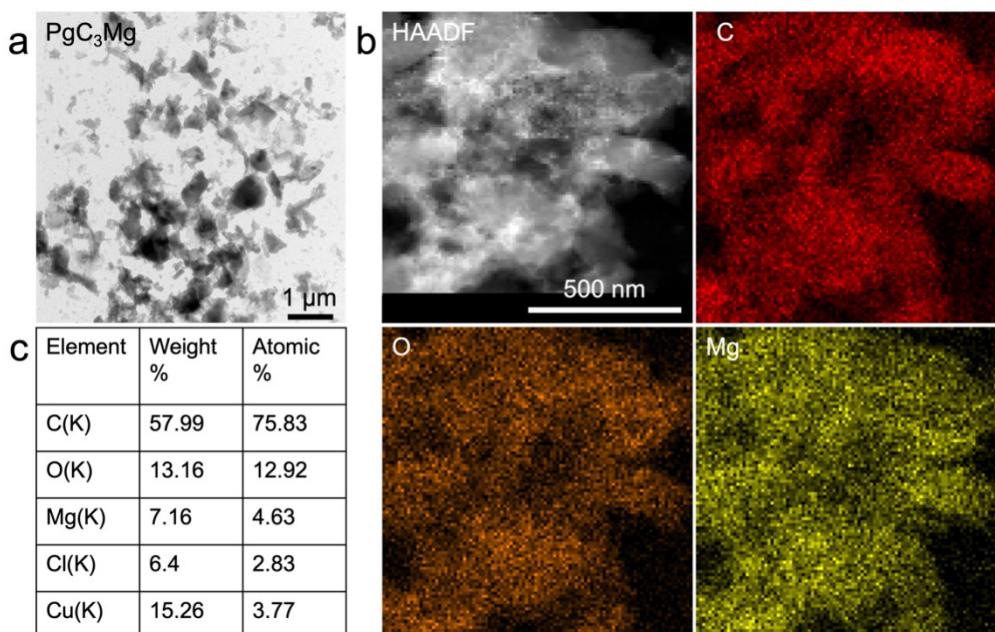

**Fig. S3.** The EDS mapping images of  $\text{PgC}_3\text{Mg}$ . TEM image (a) of  $\text{PgC}_3\text{Mg}$  and its corresponding elemental mapping images (b) and quantification results (c).

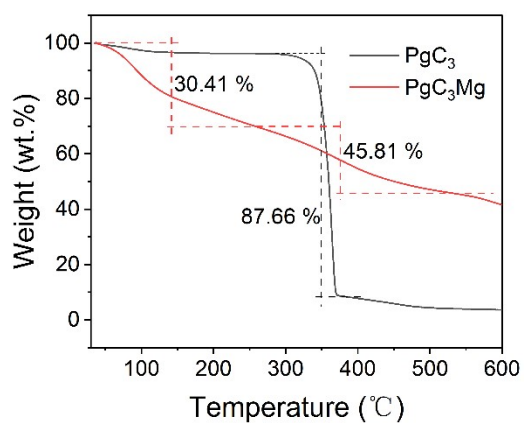

**Fig. S4.** Thermogravimetric analyses (TGA) of  $\text{PgC}_3$  and  $\text{PgC}_3\text{Mg}$  from room temperature to 600 °C in air. The final mass of  $\text{PgC}_3\text{Mg}$  corresponds to  $\text{MgO}$ .

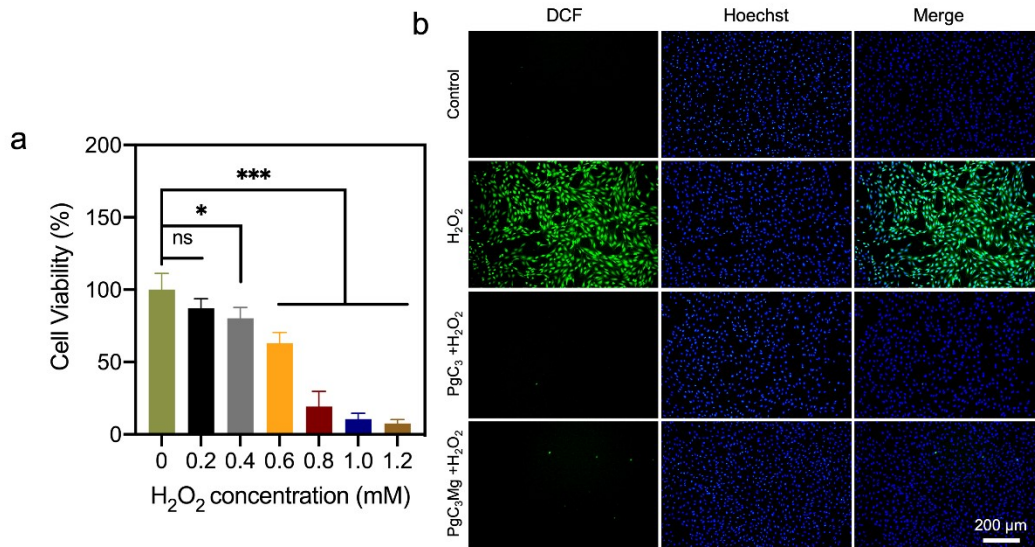

**Fig. S5.** Intracellular ROS scavenging of PgC<sub>3</sub>Mg. (a) The survival rate of BMSCs treated with different concentrations of H<sub>2</sub>O<sub>2</sub> for 24 hours by CCK-8 assay. (b) DCFH-DA staining of BMSCs after cocultured with 20 μg/mL PgC<sub>3</sub> or PgC<sub>3</sub>Mg with 400 μM H<sub>2</sub>O<sub>2</sub> treatment.

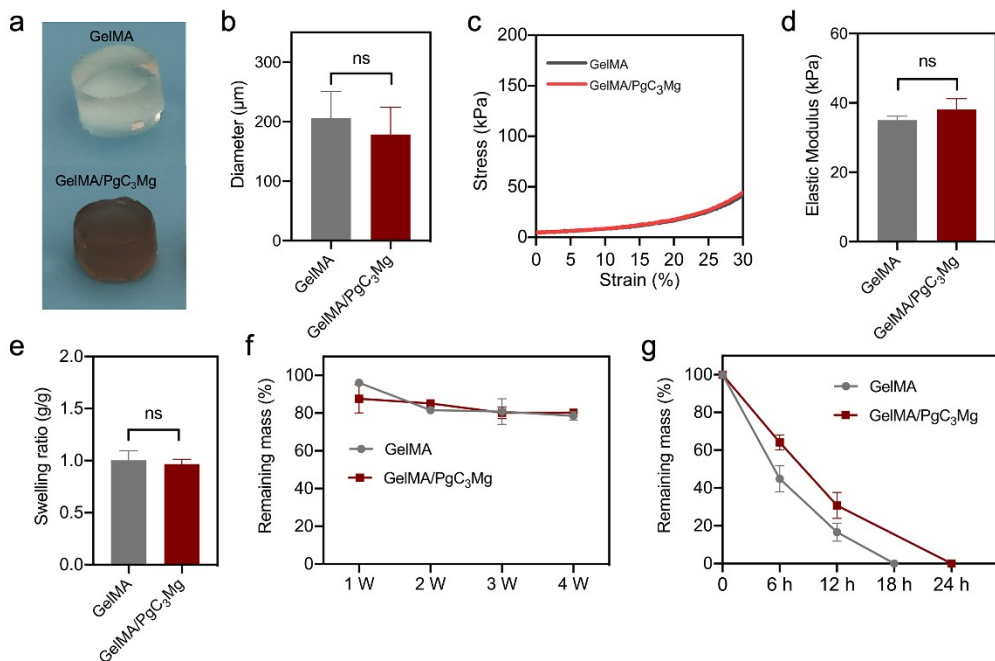

**Fig. S6.** Characteristics of GelMA and GelMA/PgC<sub>3</sub>Mg hydrogel. (a) Optical images, (b) diameter according to SEM images, (c) representative compressive stress-strain curves, (d) compressive modulus, (e) swelling ratio of GelMA and GelMA/PgC<sub>3</sub>Mg

hydrogels. Degradation properties of various hydrogels in (f) PBS and in (g) collagenase at 37 °C.

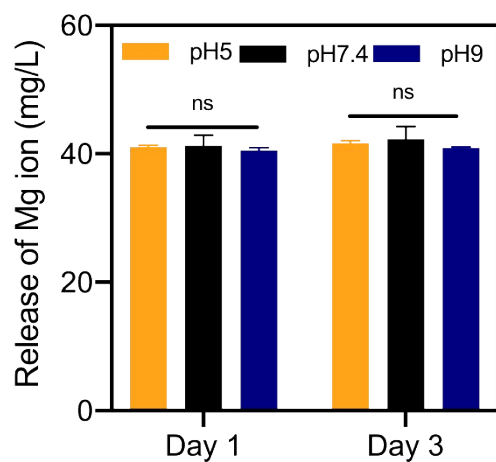

**Fig.S7.** Release of Mg ion from GelMA/PgC<sub>3</sub>Mg at different pH environments.

**Table 1.** Primers used for the RT-qPCR.

| Target gene  | Sequence                   |
|--------------|----------------------------|
| <i>Gapdh</i> | F: GCATCTTCTTGTGCAGTGCC    |
|              | R: GATGGTGATGGGTTTCCCGT    |
| <i>Alp</i>   | F: TGCCTACTTGTGTGGCGTGAA   |
|              | R: TCACCCGAGTGGTAGTCACAATG |
| <i>Runx2</i> | F: ATGCTTCATTCGCCTCACAAA   |
|              | R: GCACTCACTGACTCGGTTGG    |
| <i>Ocn</i>   | F: CCGTTTAGGGCATGTGTTGC    |
|              | R: CCGTCCATACTTTCGAGGCA    |
| <i>Opn</i>   | F: CCAGCCAAGGACCAACTACA    |
|              | R: AGTGTTTGCTGTAATGCGCC    |
